# Supplementary material for: Biobased polymers derived from itaconic acid bearing clickable groups with potent antibacterial activity and negligible hemolytic activity
Source: Royal Society of Chemistry journal article supplement (doi:10.1039/d1py00098e), 2021-01-01
Supplement: d1py00098e1.pdf [file d1py00098e1.pdf]

## Supporting Information

### **Biobased Polymers Derived from Itaconic Acid bearing clickable groups with Potent Antibacterial Activity and Negligible Hemolytic Activity**

A. Chiloeches<sup>1,2</sup>, A. Funes<sup>3</sup>, R. Cuervo-Rodríguez<sup>3</sup>, F. López-Fabal<sup>4,5</sup>, M. Fernández-García<sup>1,6</sup>, C. Echeverría<sup>1,6\*</sup>, A. Muñoz-Bonilla<sup>1,6\*</sup>

<sup>1</sup>Instituto de Ciencia y Tecnología de Polímeros (ICTP-CSIC), C/Juan de la Cierva 3, 28006 Madrid, Spain

<sup>2</sup>Universidad Nacional de Educación a Distancia (UNED), C/ Bravo Murillo 38, 28015 Madrid, Spain

<sup>3</sup>Facultad de Ciencias Químicas, Universidad Complutense de Madrid, Avenida Complutense s/n, Ciudad Universitaria, 28040 Madrid, Spain

<sup>4</sup>Hospital Universitario de Móstoles C/ Dr. Luis Montes s/n, 28935 Móstoles, Madrid, Spain.

<sup>5</sup>Universidad Francisco de Vitoria, Carretera Pozuelo a Majadahonda, Km 1.800, 28223, Madrid, Spain

<sup>6</sup>Interdisciplinary Platform for Sustainable Plastics towards a Circular Economy-Spanish National Research Council (SusPlast-CSIC), Madrid, Spain.

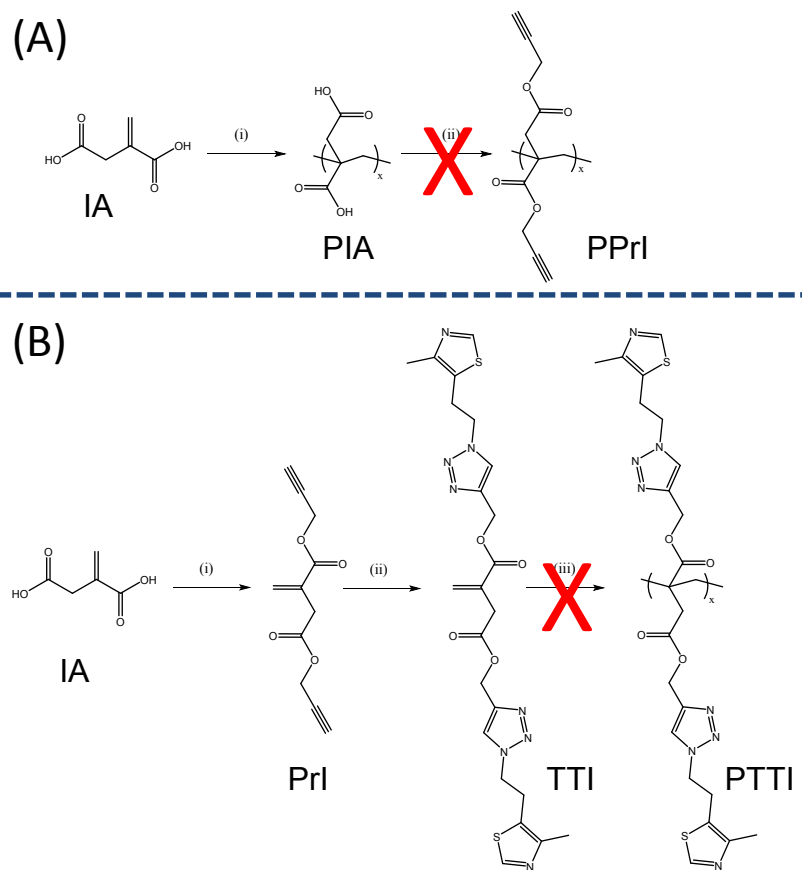

**Scheme S1.** Failed approaches 1 (A) and 2 (B) used to synthesize polymers derived from itaconic acid with thiazole and triazole groups.

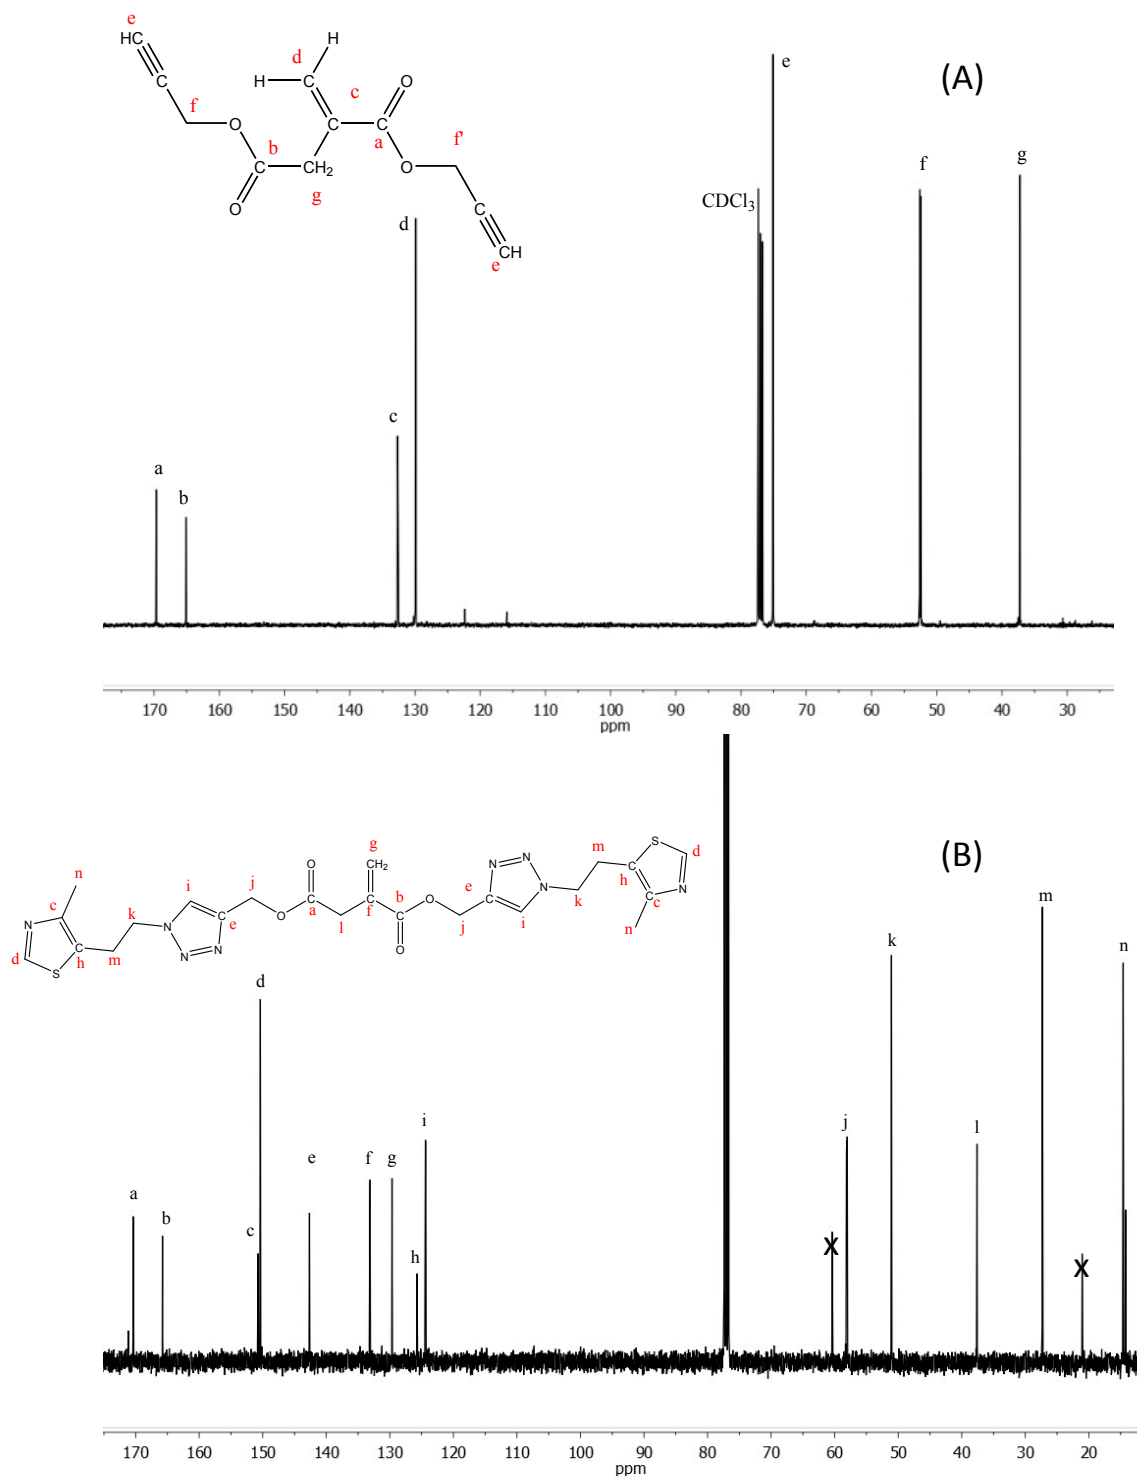

**Figure S1.**  $^{13}\text{C}$ -NMR spectra of (A) clickable monomer PrI and (B) monomer derivative TTI with thiazole and triazole groups in deuterated chloroform.

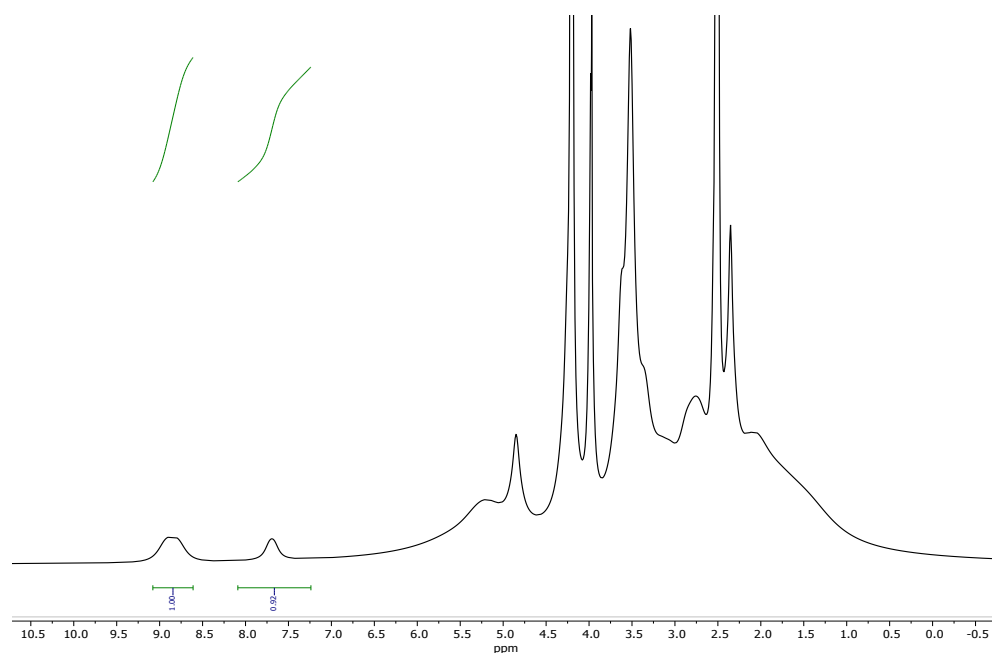

**Figure S2. Copolymer P50T-Me.  $^1\text{H-NMR}$  (400 MHz,  $\text{DMSO-d}_6$ ),  $\delta$ (ppm):** 8.82 (2H, *H*-thiazole), 7.66 (2H, *H*-thiazole), 5.24 (4H, O- $\text{CH}_2$ -thiazole), 4.85 (4H,  $\text{CH}_2$ -N), 4.15 (6H,  $\text{N}^+\text{CH}_3$  triazole), 3.97 (6H,  $\text{N}^+\text{CH}_3$  thiazole), 3.50 (4H,  $\text{CH}_2$ -thiazole and 6H, -O- $\text{CH}_3$ ), 2.33 (6H,  $\text{CH}_3$ -thiazole).

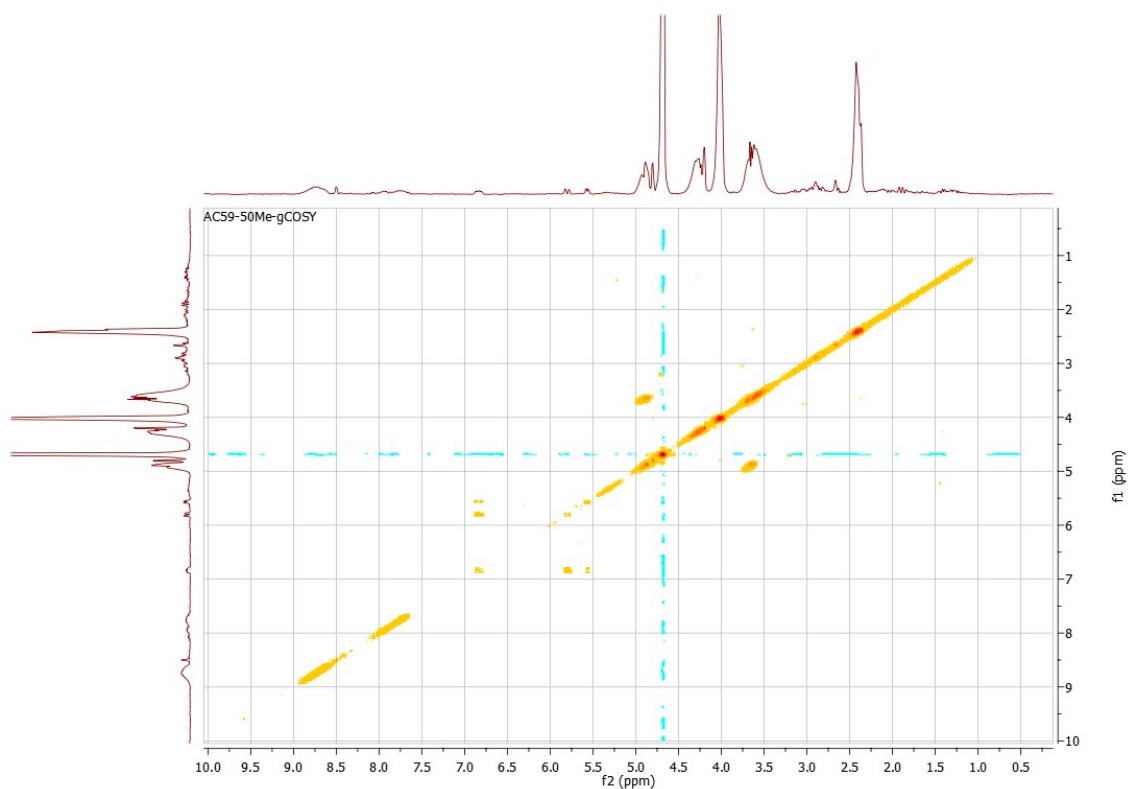

**Figure S3. COSY-NMR spectrum in deuterated water of P50T-Me copolymer.**

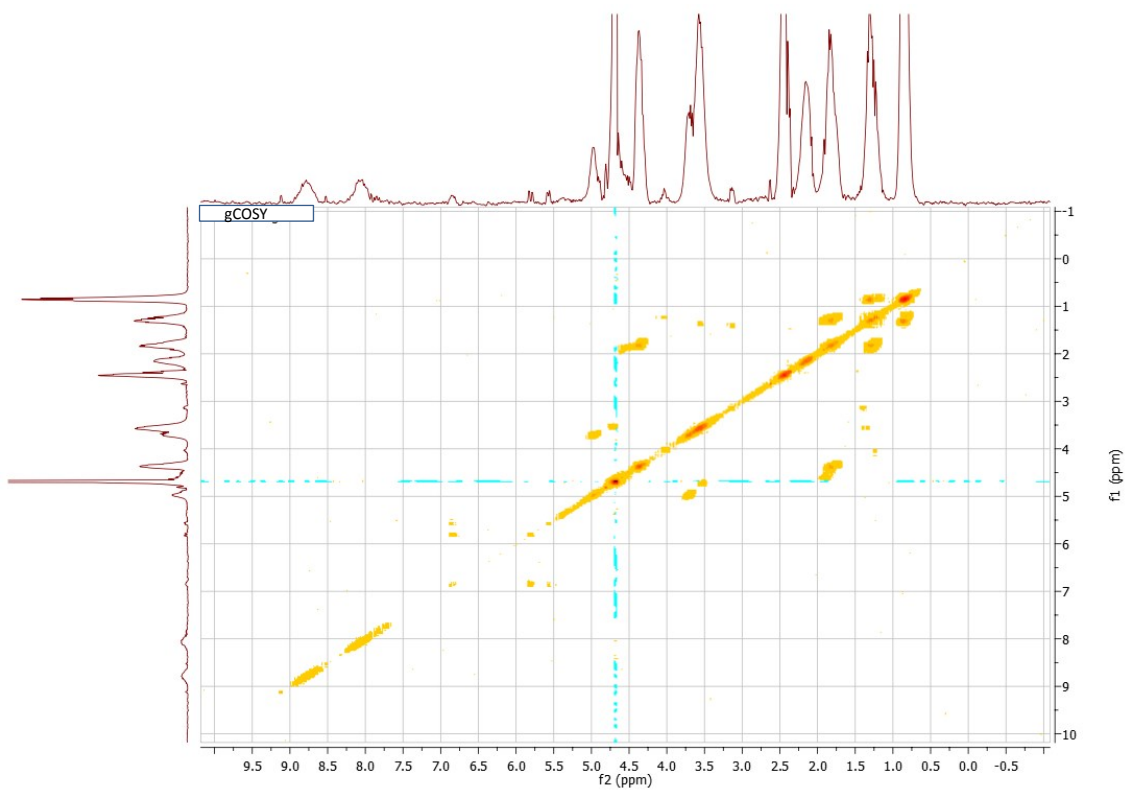

**Figure S4.** COSY-NMR spectrum in deuterated water of P50T-Bu copolymer.
